# Supplementary material for: Metatranscriptomic Analysis of Bacterial Communities on Laundered Textiles: A Pilot Case Study
Source: MDPI journal article supplement (doi:10.3390/microorganisms9081591), 2021-07-26
Supplement: s1 [file s1]

---

Supplementary Materials

## Metatranscriptomic Analysis of Bacterial Communities on Laundered Textiles: A Pilot Case Study

Content:

| Figure/Table | Page |
|--------------|------|
| Figure S1    | 2    |
| Table S1     | 3    |
| Table S2     | 4    |
| Figure S2    | 5    |
| Figure S3    | 6    |
| Figure S4    | 7    |
| Figure S5    | 8    |
| Figure S6    | 9    |

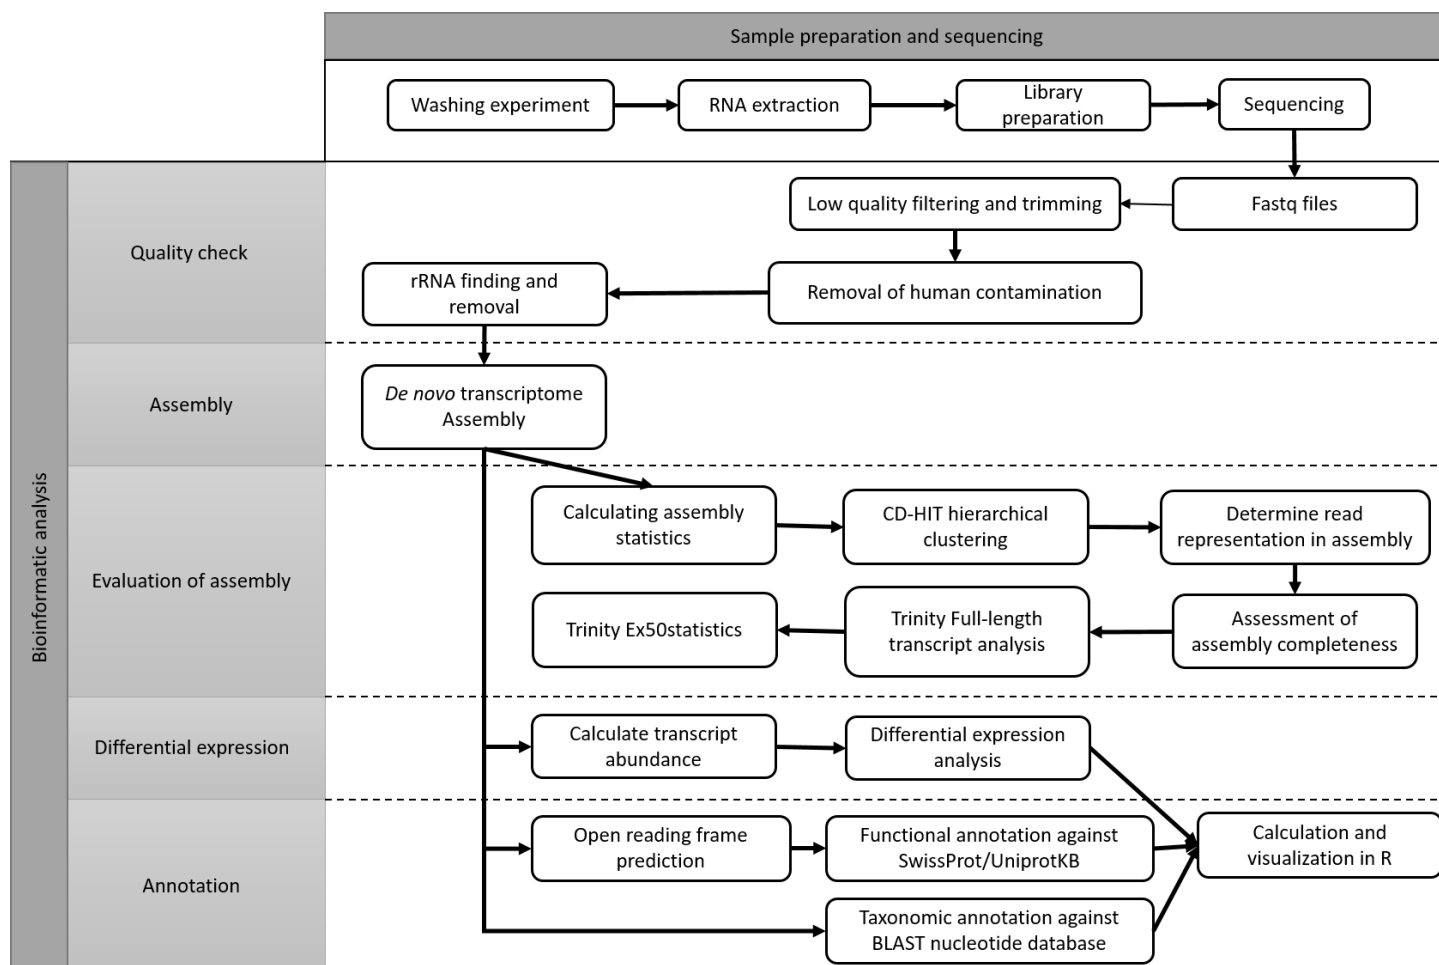

**Figure S1.** Schematic overview of the de novo transcriptome reconstruction workflow and analysis pipeline procedure.

**Table S1.** Summary of the individual quality filtering steps using individual program specifics as well as the number of input and output reads during each step of quality filtering.

| Quality filtering step                        | Program characteristics | Cotton sample 1 | Cotton sample 2 | Polyester sample 1 | Polyester sample 2 |
|-----------------------------------------------|-------------------------|-----------------|-----------------|--------------------|--------------------|
| Raw Input Reads                               |                         | 2272571         | 2072513         | 1942656            | 2004058            |
| Trim-galore                                   | Input Reads             | 2272571         | 2072513         | 1942656            | 2004058            |
|                                               | Dropped                 | 212044          | 545963          | 35872              | 130261             |
|                                               | Surviving reads         | 2060527         | 1526550         | 1906784            | 1873797            |
| Human contamination<br>(removal with Bowtie2) | Input Reads             | 2060527         | 1526550         | 1906784            | 1873797            |
|                                               | Aligned 0 times         | 96.8%           | 98.42%          | 97.97%             | 90.15%             |
|                                               | Aligned exactly 1 time  | 0.88%           | 0.39%           | 0.55%              | 4.92%              |
|                                               | Aligned >1 times        | 2.32%           | 1.19%           | 1.48%              | 4.93%              |
|                                               | Overall alignment rate  | 3.20%           | 1.58%           | 2.03%              | 9.85%              |
|                                               | Surviving Reads         | 1994595         | 1502357         | 1868081            | 1689357            |
| Ribosomal RNA<br>(removal with sortmeRNA)     | Input Reads             | 1994595         | 1502357         | 1868081            | 1689357            |
|                                               | Rfam-5.8s-database-id98 | 0.00%           | 0.00%           | 0.00%              | 0.00%              |
|                                               | Rfam-5s-database-id98   | 0.00%           | 0.01%           | 0.01%              | 0.01%              |
|                                               | Silva-arc-16s-id95      | 0.00%           | 0.00%           | 0.00%              | 0.00%              |
|                                               | Silva-arc-23s-id98      | 0.00%           | 0.00%           | 0.00%              | 0.00%              |
|                                               | Silva-bac-16s-id90      | 0.38%           | 0.41%           | 0.40%              | 0.29%              |
|                                               | Silva-bac-23s-id98      | 0.51%           | 0.82%           | 0.54%              | 0.46%              |
|                                               | Silva-euk-18s-id95      | 0.04%           | 0.02%           | 0.03%              | 0.03%              |
|                                               | Silva-euk-28s-id98      | 0.14%           | 0.08%           | 0.14%              | 0.11%              |
|                                               | Surviving Reads         | 1973152         | 1482205         | 1847134            | 1674100            |
| Trimmomatic                                   | Input Reads             | 1973152         | 1482205         | 1847134            | 1674100            |
|                                               | Dropped                 | 55134           | 25128           | 39437              | 37767              |
|                                               | Surviving Reads         | 1918018         | 1457077         | 1807697            | 1636333            |
| Final Surviving Reads                         |                         | 1918018         | 1457077         | 1807697            | 1636333            |
| Total Loss                                    |                         | 15.6%           | 29.7%           | 6.9%               | 18.3%              |

**Table S2.** Summary of the individual assembly statistics of the generated de novo transcriptome assemblies after clustering with CD-HIT-EST.

| Program   |                                    | Spades Assembler | Trinity Assembler |
|-----------|------------------------------------|------------------|-------------------|
| Transrate | N seqs                             | 12600            | 22321             |
|           | Smallest length                    | 367              | 201               |
|           | Largest length                     | 112899           | 64155             |
|           | N bases                            | 20014022         | 21766331          |
|           | Mean length                        | 1588.41          | 975.15            |
|           | N50                                | 2494             | 1555              |
|           | GC (%)                             | 50               | 50                |
| Bowtie2   | Read representation                |                  |                   |
|           | Cotton sample 1                    | 81.27%           | 80.70%            |
|           | Cotton sample 2                    | 89.57%           | 89.36%            |
|           | Polyester sample 1                 | 86.11%           | 85.37%            |
|           | Polyester sample 2                 | 87.78%           | 87.60%            |
| BUSCO     | Bacteria (bacteria_odb10 database) |                  |                   |
|           | Complete BUSCOs                    | 66.1%            | 68.5%             |
|           | Complete and single-copy BUSCOs    | 22.6%            | 26.6%             |
|           | Complete and duplicated BUSCOs     | 43.5%            | 41.9%             |
|           | Fragmented BUSCOs                  | 1.6%             | 2.4%              |
|           | Missing BUSCOs                     | 32.3%            | 29.1%             |
| Trinity   | Full-length transcripts estimation |                  |                   |
|           | 100–90% coverage                   | 1855             | 1955              |
|           | 90–80% coverage                    | 476              | 511               |
|           | 80–70% coverage                    | 364              | 474               |
|           | 70–60% coverage                    | 445              | 535               |
|           | 60–50% coverage                    | 448              | 619               |
|           | 50–40% coverage                    | 569              | 771               |
|           | 40–30% coverage                    | 539              | 836               |
|           | 30–20% coverage                    | 410              | 732               |
|           | 20–10% coverage                    | 208              | 547               |
|           | 10–0% coverage                     | 19               | 62                |
|           | Total contigs                      | 5333             | 7042              |

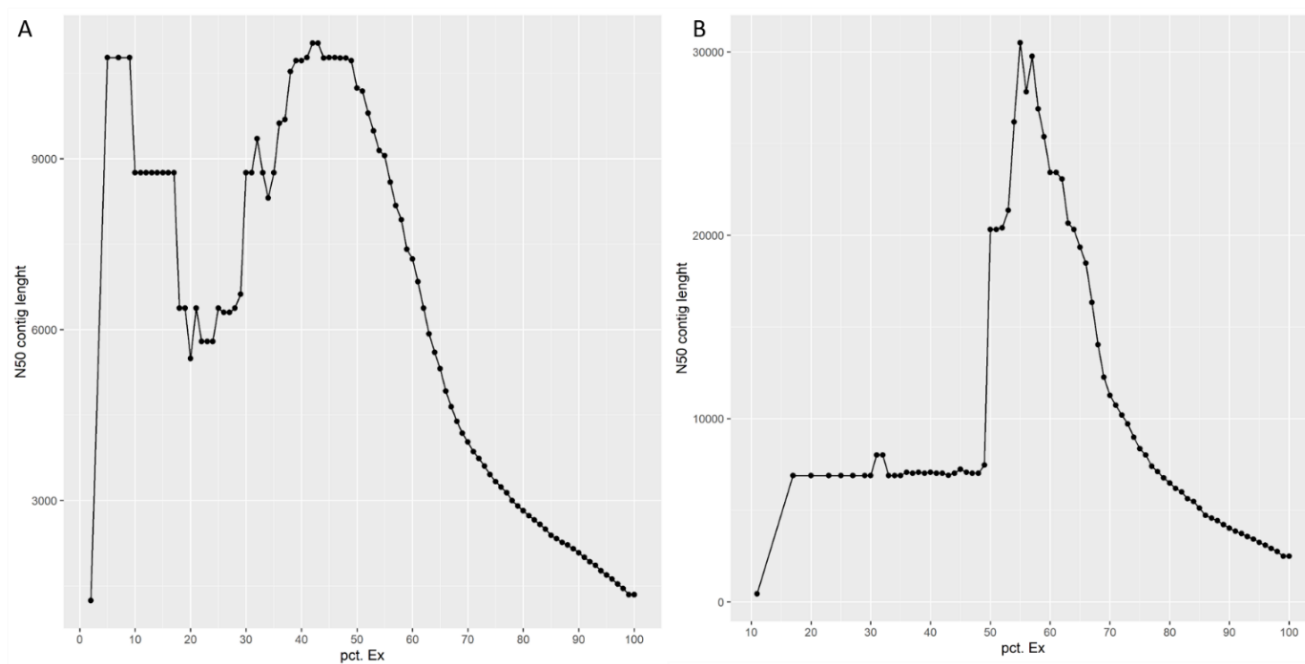

**Figure S2.** Estimated ExN50 values of assemblies using (A) Trinity and (B) Spades. Peaks represent ExN50 contig lengths. Peaks near 0 correspond to only highly expressed genes in the assembly and peaks near 100% correspond to low expressed transcripts in the assembly.

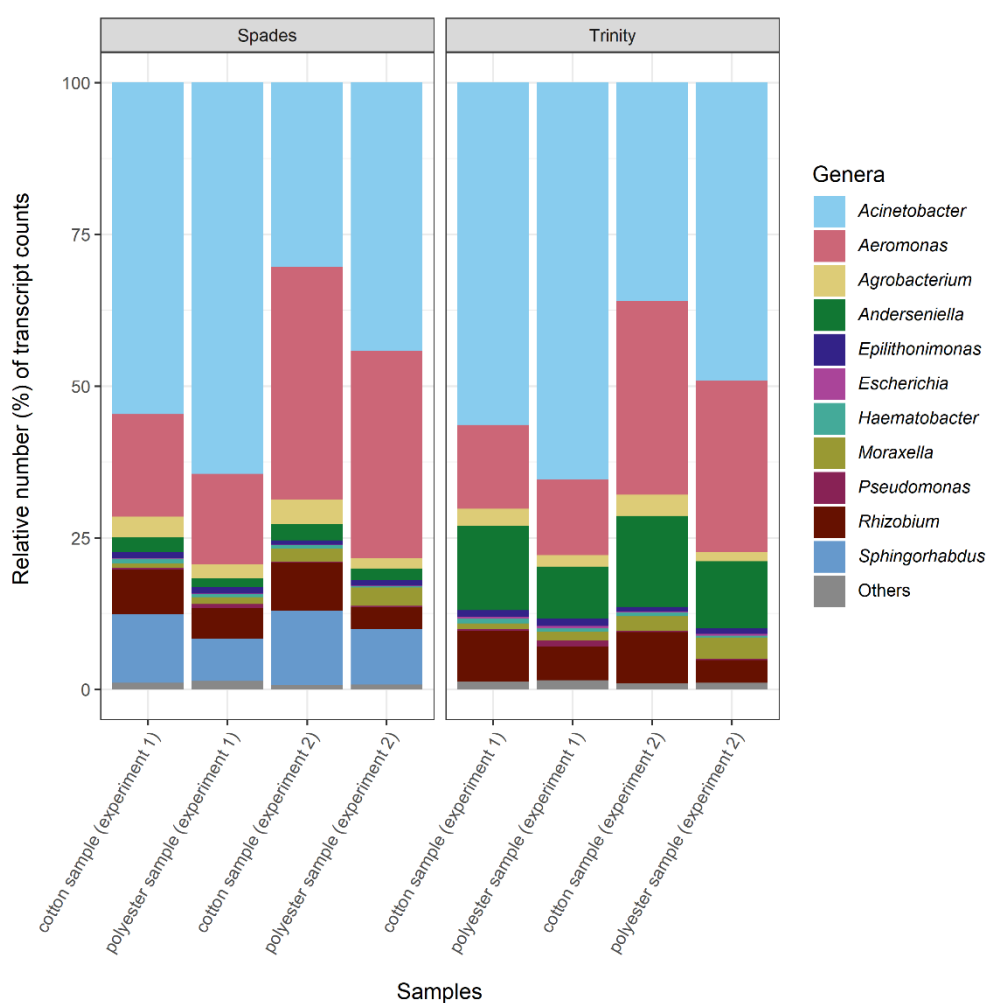

**Figure S3.** Taxonomic annotation of the different samples for the two assembler used. For better visualization, only the 11 genera with the highest relative number of transcripts within the respective assembly are shown, in alphabetical order.

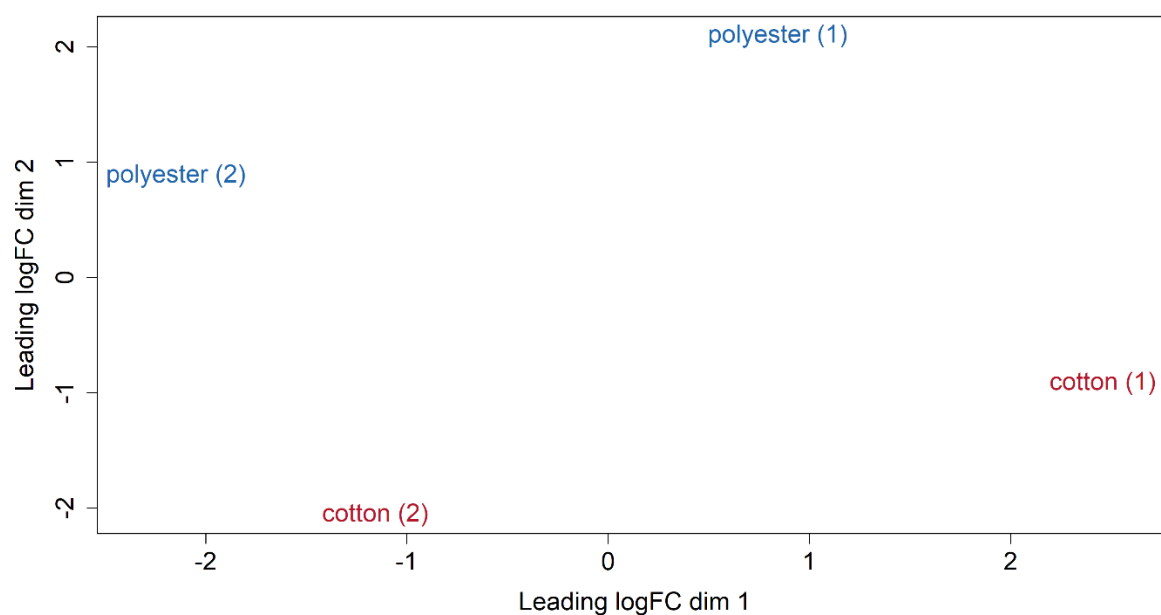

**Figure S4.** Multi-dimensional scaling plot based on RNAseq expression profiles from different tissue type samples generated with the Spades assembly. Distances between samples in the plot are calculated based on leading log<sub>2</sub> fold changes (logFC) between each cotton and polyester sample. The numbers in parentheses represent the different washing experiments.

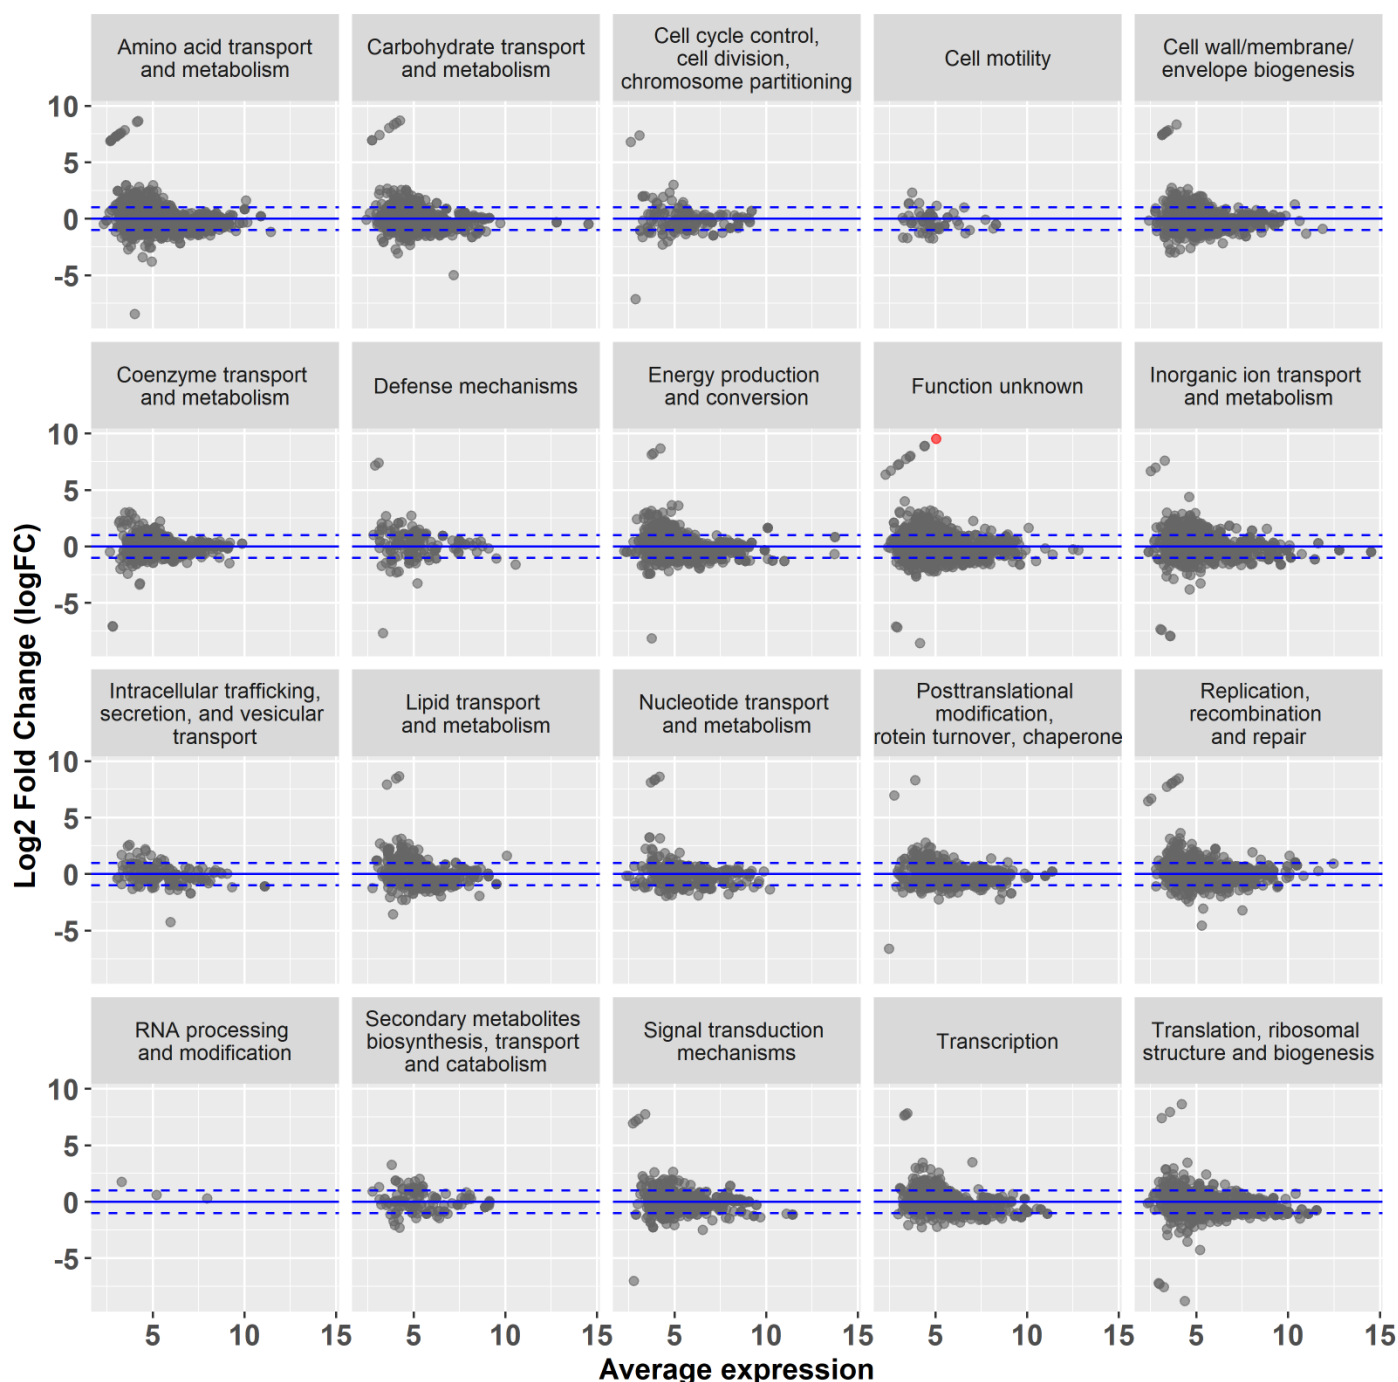

**Figure S5.** Mean expression versus log<sub>2</sub> fold change plots (MA-plots) of the Spades assembly. Plot shows average expression logarithmically transformed counts per million versus the log<sub>2</sub> fold change (logFC) for a pairwise comparison of cotton versus polyester samples. Black dots represent the individual genes. Dashed lines show genes that were two-fold up or downregulated, when comparing cotton versus polyester samples. Negative changes represent downregulated genes and positive changes represent upregulated genes. Genes that have no or only a slight change in expression are located within the area of the dashed lines. Red points show significantly differentially expressed genes with adjusted *p*-value < 0.01.



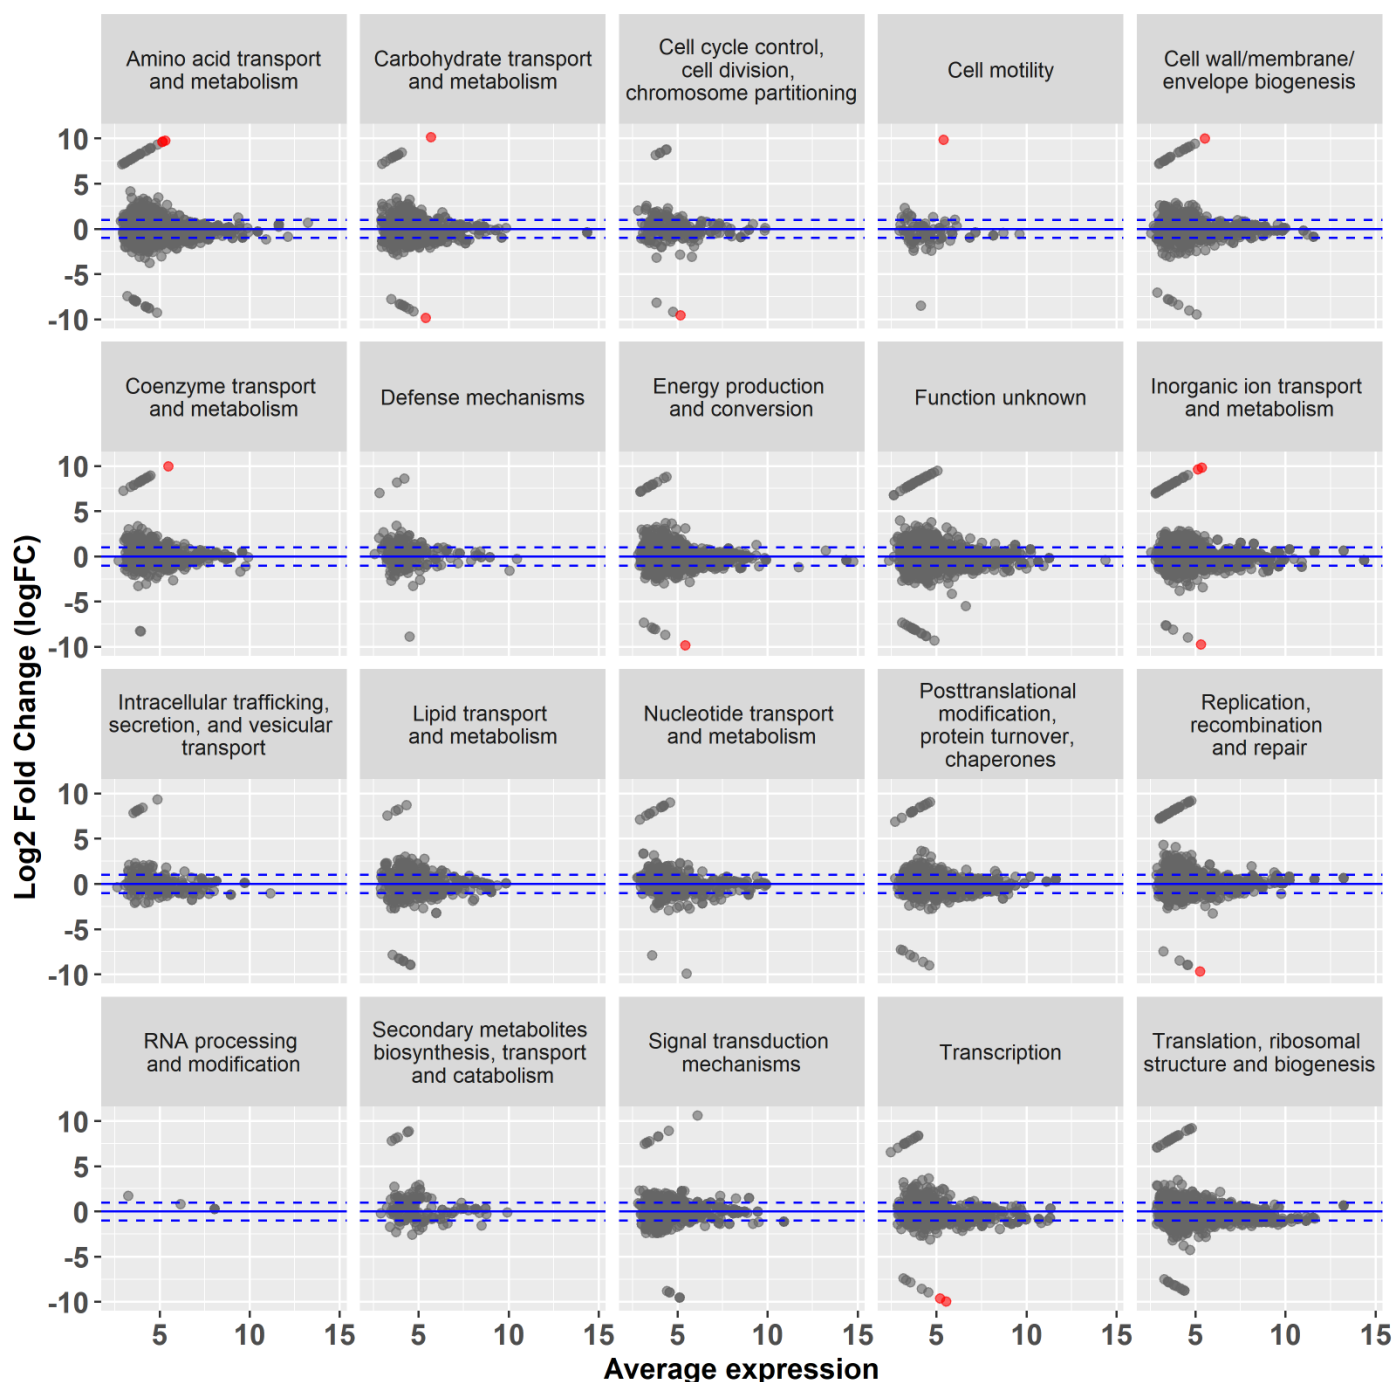

**Figure S6.** Mean expression versus log2 fold change plots (MA-plots) of the Trinity assembly. Plot shows average expression logarithmically transformed counts per million versus the log2 fold change (logFC) for a pairwise comparison of cotton versus polyester samples. Black dots represent the individual genes. Dashed line show genes that were two-fold up or downregulated, when comparing cotton versus polyester samples. Negative changes representing downregulated genes and positive changes representing upregulated genes. Genes that have no or only a slight change in expression are located within the area of the dashed line. Red points show significantly differential expressed genes with adjusted  $p$ -value < 0.01.
